# Supplementary material for: Preliminary Transcriptome Analysis of Mature Biofilm and Planktonic Cells of Salmonella Enteritidis Exposure to Acid Stress
Source: PubMed Central journal article supplement (PMC5622974; doi:10.3389/fmicb.2017.01861), 2017-09-26
Supplement: Image1.pdf [file Image1.pdf]

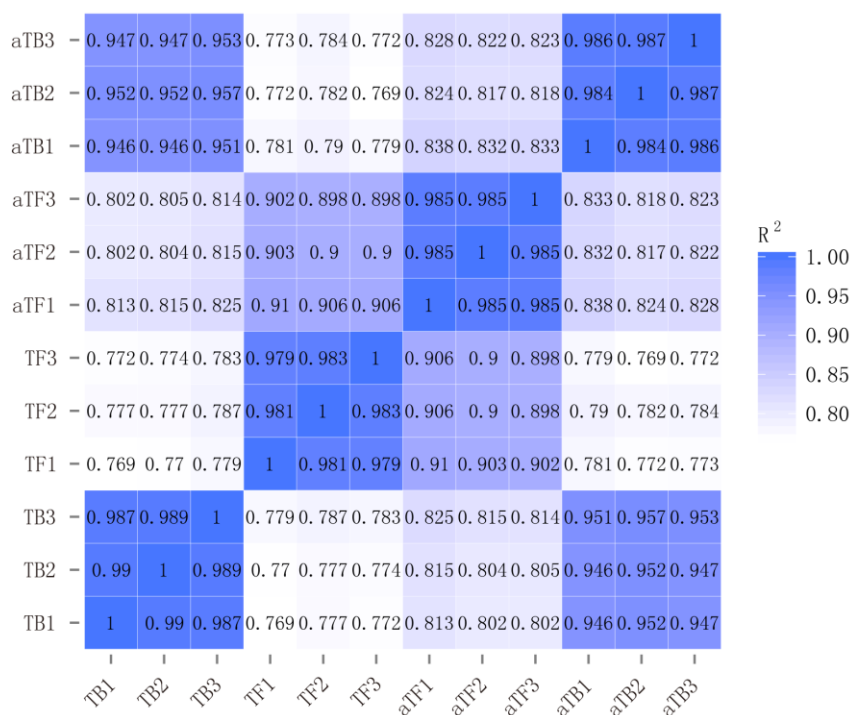

**FIG S1 The correlation coefficients among the twelve RNA-seq libraries (correlation matrix of the whole data set).**
