# Supplementary material for: Preliminary Transcriptome Analysis of Mature Biofilm and Planktonic Cells of Salmonella Enteritidis Exposure to Acid Stress
Source: PubMed Central journal article supplement (PMC5622974; doi:10.3389/fmicb.2017.01861), 2017-09-26
Supplement: Table1.pdf [file Table1.pdf]

**Table S1 Primer pairs used for qRT-PCR in this study**

| GeneID         | Gene/protein annotation                            | Primer pair                                                        |
|----------------|----------------------------------------------------|--------------------------------------------------------------------|
| <i>16s DNA</i> | Transcription                                      | F, 5'-AGGCCTTCGGGTTGTAAAGT-3'<br>R, 5'-GTTAGCCGGTGCTTCTTCTG-3'     |
| <i>RS22505</i> | transcriptional regulator                          | F,5'-GGCGGCATTCCGGCGATAAT-3'<br>R,5'-TGTTGCATCCATGGCCGGTG-3'       |
| <i>RS00885</i> | AraC family transcriptional regulator              | F,5'-ACGGAAACCACCGGACAGGA-3'<br>R,5'-AGCAATTCGCCGGCTACCAC-3'       |
| <i>RS12810</i> | PTS sugar transporter                              | F,5'-AGCATCATGCCGCCCATTC-3'<br>R,5'-TACGCCGGGCTGCTCATT-3'          |
| <i>RS06450</i> | RNA polymerase sigma factor RpoS                   | F,5'-GCGAATCCACCAGTTGCGT-3'<br>R,5'-GTGGACTGGCGTTGCTGGAC-3'        |
| <i>RS17410</i> | adhesin                                            | F,5'-GGTGACGATCCCTCGCCAGA-3'<br>R,5'-TCCACGACCTGTCCGGCATT-3'       |
| <i>RS05790</i> | NAD-dependent succinate-semialdehyde dehydrogenase | F,5'-TCGTTTACCGGCTCGACGGA-3'<br>R,5'-CGCGCCTTCGACGGCTTTAT-3'       |
| <i>RS16605</i> | diguanylate cyclase AdrA                           | F,5'-CTGTCTTTGGCGGCTGGTGG-3'<br>R,5'-ACATGCCGGAGAGGATCGCA-3'       |
| <i>RS10680</i> | protein MgtC                                       | F,5'-CTCGGCGGATAACGGGAGTT-3'<br>R,5'-CATCGGCGTGTATGCGGCT-3'        |
| <i>RS13320</i> | AraC family transcriptional regulator              | F,5'-TGGGGCCGAAAAGTCTGCAT-3'<br>R,5'-ACGACATCGTCCGGGGAGTA-3'       |
| <i>RS14135</i> | fimbrial protein                                   | F,5'-AGCCACTGTCCCGTTTCGTTG-3'<br>R,5'-ACCTGCAAGCCCGTCAATTCC-3'     |
| <i>RS06320</i> | invasion protein InvE                              | F,5'-CTCCAGGCGGAACAACCTGG-3'<br>R,5'-GGCTTATTGCGCGCCAGCTA-3'       |
| <i>RS17740</i> | citrate (pro-3S)-lyase subunit beta                | F,5'-CAGCAGTTCGGTGCCTTCCG-3'<br>R,5'-CGGTAGAAATCGCCCACGCC-3'       |
| <i>RS12125</i> | sulfate transporter subunit                        | F,5'-ACGATCAGGCCAAAGCGCAG-3'<br>R,5'-GTCGCCAGTAGCGCTTCGTT-3'       |
| <i>RS03030</i> | outer membrane protein                             | F,5'-CACCTCTCATCGGCGTAGCG-3'<br>R,5'-GCGCCAACGTGCAGTACAGA-3'       |
| <i>RS00635</i> | type III secretion system needle protein SsaG      | F,5'-AGGCAAATTGCGCTTTAATCATCG-3'<br>R,5'-GGATATGCTCTCCCACATGGCG-3' |
| <i>RS02025</i> | minor curlin subunit                               | F,5'-TCCTTCCTGGCGTACTCTGGC-3'<br>R,5'-CTGGGATTGCAACCGCGACA-3'      |
| <i>RS11700</i> | 3-ketoacyl-CoA thiolase                            | F,5'-GAATGCGCCAGACTGGGTGG-3'<br>R,5'-ATGATGGGGCTAACGGCGGA-3'       |
