# Supplementary material for: Preliminary Transcriptome Analysis of Mature Biofilm and Planktonic Cells of Salmonella Enteritidis Exposure to Acid Stress
Source: PubMed Central journal article supplement (PMC5622974; doi:10.3389/fmicb.2017.01861), 2017-09-26
Supplement: Table2.pdf [file Table2.pdf]

**Table S2 Significant alignment with known sRNAs**

| sRNA name        | Strand | Length | Known sRNA name in bacteria                                                                  | Structure |
|------------------|--------|--------|----------------------------------------------------------------------------------------------|-----------|
| <i>sRNA00048</i> | Plus   | 247    | <i>S. Typhimurium, Escherichia coli, Shigella flexneri, RyfA</i>                             | HS        |
| <i>sRNA00073</i> | Minus  | 210    | <i>S. Typhimurium, Escherichia coli, GcvB</i>                                                | HS        |
| <i>sRNA00078</i> | Plus   | 268    | <i>S. Typhimurium, Escherichia coli, Sib</i>                                                 | HS        |
| <i>sRNA00128</i> | Plus   | 159    | <i>S. Typhimurium, Escherichia coli, GlmZ</i>                                                | HP        |
| <i>sRNA00132</i> | Plus   | 51     | <i>S. Typhimurium, Escherichia coli, S. Typhimurium, Yersinia pseudotuberculosis, SPOT42</i> | HP        |
| <i>sRNA00180</i> | Minus  | 52     | <i>S. Typhimurium, sroC</i>                                                                  | HP        |
| <i>sRNA00187</i> | Plus   | 67     | <i>S. Typhimurium, Enterobacteria, RtT</i>                                                   | HP        |
| <i>sRNA00273</i> | Plus   | 247    | <i>S. Typhimurium, Shigella flexneri, RyfA</i>                                               | HS        |
| <i>sRNA00287</i> | Plus   | 268    | <i>S. Typhimurium, Escherichia coli, Sib</i>                                                 | HS        |
| <i>sRNA00301</i> | Plus   | 159    | <i>S. Typhimurium, Escherichia coli, GlmZ</i>                                                | HP        |
